# Supplementary material
Source: publisher figshare collection journal article supplement (https://future-science-group.figshare.com/ndownloader/files/31314940)
Supplement: Supplementary file 1 [file 31314940]

**Table S1.** NF-*κ*B functions in breast cancer.

|  | **Initiation** | **Progression** | **Metastasis** | **Chemoresistance** |
| --- | --- | --- | --- | --- |
| **Increase** | Cyclin D1  c-myc | Cyclin D1  Integrin α  IL-6  IL-8  MIP2α  iNos  Cox-2  CXCL1 | uPA  MMP9 | TRAF-1  cIAP-2  Mn-SOD  DAD-1  GADD45β |
| **Decrease** | p53  GADD153 | **-----------** | TIMP  PAI | GADD153 |

**cIAP-2:** Cellular inhibitor of apoptosis 2; **CXCL 1:** chemokine (C-X-C motif) ligand 1; **DAD-1:** Defender Against Cell Death 1; **GADD:** Growth Arrest- And DNA Damage; **IL:** Interleukin; **iNos:** Inducible Nitric Oxide Synthase; **MIP:** Macrophage Inflammatory Protein; **MMP9:** Matrix metallopeptidase 9; **Mn-SOD:** Manganese superoxide dismutase; **PAI:** Plasminogen activator inhibitor; **TIMP:** Tissue Inhibitor of Metalloproteinases; **TRAF-1:** TNF receptor-associated factor 1; **uPA:** Urokinase-type plasminogen activator.
